# Supplementary material for: Identification and Analysis of Micro-Exon Genes in the Rice Genome
Source: MDPI journal article supplement (doi:10.3390/ijms20112685), 2019-05-31
Supplement: s1 [file s1]

**A**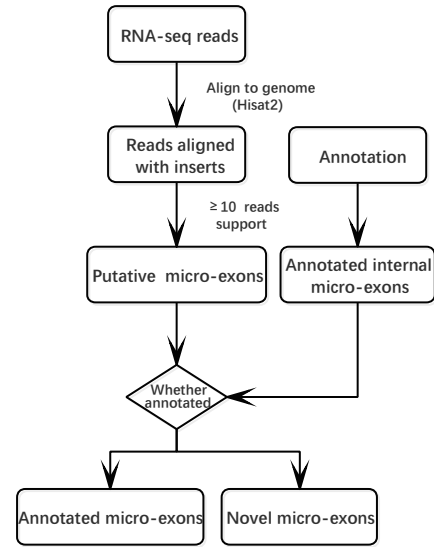**B**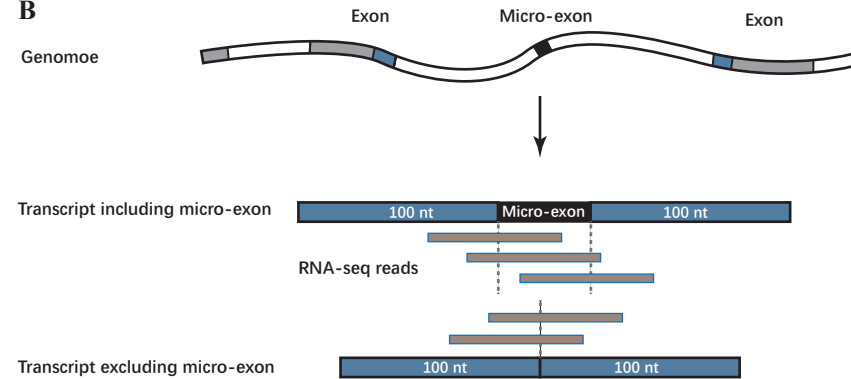

**Figure S1.** The pipeline of identification and PSI calculation for the micro-exons. (A) The progress of micro-exons identification. (B) The illustration of PSI calculation. Reads mapped to the left and right junctions of the micro-exon are counted as  $R_R$  and  $R_L$ , and reads mapped to the junction of the micro-exon skipping are counted as  $R_{skipped}$ .
